# Supplementary material for: UV photolysis of thiourea and its N-methylated derivative in cryogenic matrices
Source: Royal Society of Chemistry journal article supplement (doi:10.1039/d4cp00016a), 2024-01-01
Supplement: d4cp00016a1.pdf [file d4cp00016a1.pdf]

## Supporting Information for the

### UV photolytic study of thiourea and its N-methylated derivative in cryogenic matrices

Sándor Góbi\*,<sup>1,2</sup> Barbara Keresztes,<sup>1,3</sup> Anita Schneiker,<sup>1,3</sup> and György Tarczay<sup>1,2,4</sup>

<sup>1</sup>*Laboratory of Molecular Spectroscopy, Institute of Chemistry,  
ELTE Eötvös Loránd University, PO Box 32, H-1518 Budapest,  
Hungary*

<sup>2</sup>*MTA-ELTE Lendület Laboratory Astrochemistry Research Group,  
Institute of Chemistry, ELTE Eötvös Loránd University, PO Box 32,  
H-1518 Budapest, Hungary*

<sup>3</sup>*Hevesy György PhD School of Chemistry, Institute of Chemistry,  
ELTE Eötvös Loránd University, PO Box 32, H-1518 Budapest,  
Hungary*

<sup>4</sup>*Centre for Astrophysics and Space Science, ELTE Eötvös Loránd University,  
PO Box 32, H-1518 Budapest, Hungary*

(\*sandor.gobi@ttk.elte.hu)

(Dated: 13 February 2024)

**TABLE S1:** The main experimental vibrational frequencies of TU thione tautomer isolated in solid Ar and *para*-H<sub>2</sub> matrices as well as values taken from the literature.

| Vibrational mode <sup>a</sup> | Ar <sup>b</sup>               | Ar <sup>c</sup>    |       | <i>para</i> -H <sub>2</sub> <sup>b</sup> | <i>normal</i> -H <sub>2</sub> <sup>c</sup> |       |
|-------------------------------|-------------------------------|--------------------|-------|------------------------------------------|--------------------------------------------|-------|
|                               | $\tilde{\nu}^d$               | $\tilde{\nu}^d$    | $I^e$ | $\tilde{\nu}^d$                          | $\tilde{\nu}^d$                            | $I^e$ |
| <b>Q1, Q2</b>                 | 3538.8                        | 3539               | 172   | 3547.6, <u>3545.1</u>                    | 3546                                       | 118   |
| <b>Q3</b>                     | 3424.4                        | 3424               | 47    | 3432.6, <u>3430.7</u>                    | 3432                                       | 28    |
| <b>Q4</b>                     | 3417.6                        | 3418               | 67    | 3426.1, <u>3424.3</u>                    | 3425                                       | 79    |
| <b>Q5</b>                     | 1610.5                        | 1610               | 71    | 1614.5                                   | 1612                                       | 83    |
| <b>Q6</b>                     | <u>1589.8</u> , 1581.2        | <u>1590</u> , 1581 | 152   | 1590.3                                   | 1593                                       | 224   |
|                               | 1518.6                        | 1518               | 6     | 1520.6                                   | 1518                                       | 6     |
| <b>Q7</b>                     | 1401.2                        | 1401               | 96    | 1407.2                                   | 1412                                       | 84    |
| <b>Q8</b>                     | <u>1389.0</u> , <u>1384.5</u> | 1389, <u>1385</u>  | 384   | 1390.9                                   | 1391                                       | 352   |
|                               | 1272.7                        | 1273               | 1     | 1274.8                                   | 1282, 1274                                 | 3     |
|                               | 1191.9                        | 1192               | 9     | 1200.5b                                  | 1204                                       | 6     |
|                               | 1078.3                        | 1078               | 7     | 1085.8b                                  | 1088                                       | 3     |
| <b>Q10</b>                    | 1043.3                        | 1043               | 74    | 1047.6                                   | 1050                                       | 68    |
| <b>Q9</b>                     | 1023.9                        | 1024               | 12    | 1030.8b                                  | 1032                                       | 13    |
| <b>Q11</b>                    | 759.8                         | 760                | 16    | 760.9                                    | 759                                        | 16    |
| <b>Q13</b>                    | 712.1                         | 712                | 28    | –                                        | 749                                        | 20    |
| <b>Q14</b>                    | 644.4                         | 645                | 29    | –                                        | 688                                        | 12    |

<sup>a</sup> for an approximate description and PED analysis, see Ref. 1

<sup>b</sup> this work

<sup>c</sup> data taken from Ref. 2

<sup>d</sup> in cm<sup>-1</sup>; b: broad; more intense components of split bands are underlined

<sup>e</sup> relative integrated intensities

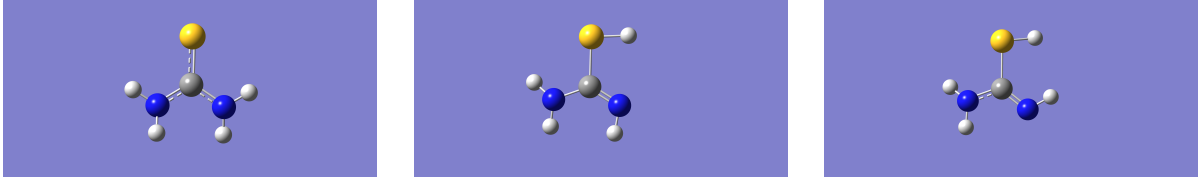

**FIG. S1:** Structures of the thione (left), the *s,t*- (middle), and the *s,c*-thiol (right) tautomers of TU.

**TABLE S2:** The main experimental vibrational frequencies of the *s,t*-thiol tautomer of TU isolated in solid Ar and *para*-H<sub>2</sub> matrices as well as values taken from the literature.

| Vibrational mode <sup>a</sup> | Ar <sup>b</sup> | Ar <sup>c</sup> |                       | <i>para</i> -H <sub>2</sub> <sup>b</sup> | <i>normal</i> -H <sub>2</sub> <sup>c</sup> |                       |
|-------------------------------|-----------------|-----------------|-----------------------|------------------------------------------|--------------------------------------------|-----------------------|
|                               | $\tilde{\nu}^d$ | $\tilde{\nu}^d$ | <i>I</i> <sup>e</sup> | $\tilde{\nu}^d$                          | $\tilde{\nu}^d$                            | <i>I</i> <sup>e</sup> |
| <b>Q1</b>                     | 3519.7          | 3520            | 68                    | 3530.2                                   | 3529                                       | 18                    |
| <b>Q2</b>                     | 3419.2          | 3419            | 27                    | –                                        | 3427                                       | 35                    |
| <b>Q4</b>                     | 2624.9?         | 2625            | 13                    | 2618.1                                   | 2619                                       | 10                    |
| <b>Q5</b>                     | 1640.6          | 1641            | 293                   | 1643.9                                   | 1642                                       | 324                   |
| <b>Q6</b>                     | 1597.1          | 1597            | 68                    | 1598.7                                   | 1599                                       | 69                    |
|                               | –               | –               | –                     | –                                        | 1399                                       | 20                    |
|                               | 1341.6          | 1342            | 26                    | 1346.6                                   | 1348                                       | 18                    |
| <b>Q7</b>                     | 1317.7          | 1318            | 187                   | 1321.5                                   | 1325                                       | 146                   |
| <b>Q8</b>                     | 1086.2          | 1086            | 44                    | 1088.7                                   | 1092                                       | 52                    |
| <b>Q9</b>                     | 1067.1          | 1067            | 48                    | 1070.3                                   | 1073                                       | 60                    |
| <b>Q10</b>                    | 888.4           | 890, <u>888</u> | 16                    | 891.4                                    | 894                                        | 19                    |
| <b>Q11</b>                    | 807.3           | 807             | 34                    | –                                        | –                                          | –                     |
|                               | 772.6           | 772             | 25                    | –                                        | 783                                        | 44                    |
| <b>Q12</b>                    | 670.6           | 671             | 53                    | 673.4                                    | 674                                        | 43                    |

<sup>a</sup> for an approximate description and PED analysis, see Ref. 1

<sup>b</sup> this work

<sup>c</sup> data taken from Ref. 2

<sup>d</sup> in cm<sup>-1</sup>; more intense components of split bands are underlined

<sup>e</sup> relative integrated intensities

**TABLE S3:** The main experimental vibrational frequencies of the *s,c*-thiol tautomer of TU isolated in solid Ar and *para*-H<sub>2</sub> matrices as well as values taken from the literature.

| Vibrational mode <sup>a</sup> | Ar <sup>b</sup>  | Ar <sup>c</sup> |       | <i>para</i> -H <sub>2</sub> <sup>b</sup> | <i>normal</i> -H <sub>2</sub> <sup>c</sup> |       |
|-------------------------------|------------------|-----------------|-------|------------------------------------------|--------------------------------------------|-------|
|                               | $\tilde{\nu}^d$  | $\tilde{\nu}^d$ | $I^e$ | $\tilde{\nu}^d$                          | $\tilde{\nu}^d$                            | $I^e$ |
| <b>Q1</b>                     | 3522.2           | 3522            | 84    | 3527.2                                   | 3525                                       | 80    |
| <b>Q2</b>                     | 3414.8           | 3415            | 39    | –                                        | –                                          | –     |
| <b>Q4</b>                     | 2624.9?          | 2623            | 6     | –                                        | –                                          | –     |
| <b>Q5</b>                     | 1649.2           | 1649            | 327   | 1653.2                                   | 1652                                       | 235   |
| <b>Q6</b>                     | –                | 1580            | 40    | –                                        | –                                          | –     |
|                               | –                | 1445            | 2     | 1449.8b                                  | 1451                                       | 147   |
| <b>Q7</b>                     | 1293.8b          | 1294            | 149   | 1298.2b                                  | 1300                                       | 106   |
| <b>Q8</b>                     | 1120.8b, 1113.1b | 1121, 1112      | 80    | 1121.0b                                  | –                                          | –     |
| <b>Q9</b>                     | 1076.9           | 1077            | 59    | 1080.2                                   | 1084                                       | 186   |
| <b>Q10</b>                    | 911.3b           | 909             | 16    | –                                        | 913                                        | 26    |
|                               | 829.2b           | 829             | 6     | –                                        | –                                          | –     |
| <b>Q12</b>                    | 657.3b           | 658             | 35    | 660.0                                    | –                                          | –     |

<sup>a</sup> for an approximate description and PED analysis, see Ref. 1

<sup>b</sup> this work

<sup>c</sup> data taken from Ref. 2

<sup>d</sup> in cm<sup>-1</sup>; b: broad; ?: tentative assignment

<sup>e</sup> relative integrated intensities

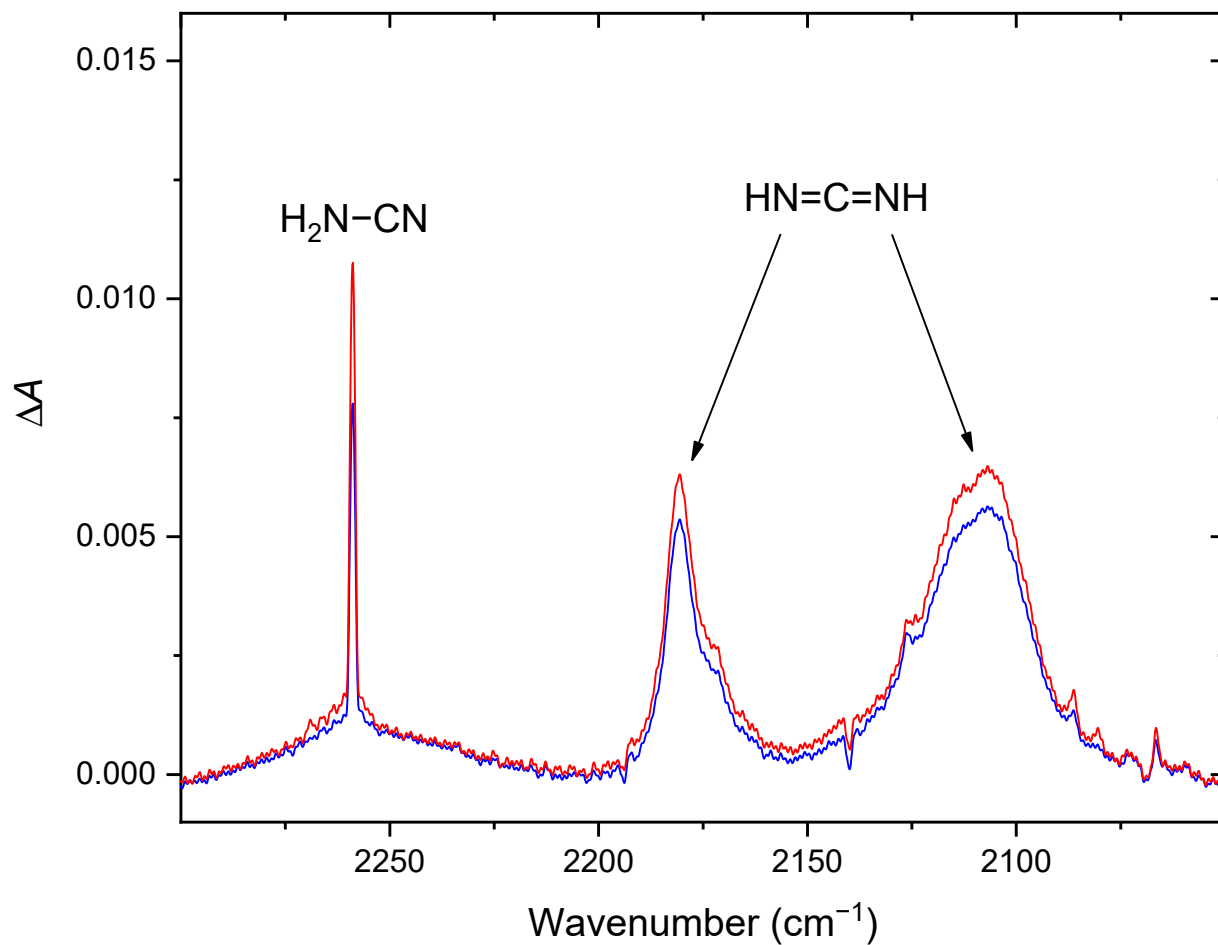

**FIG. S2:** Difference spectra of the most prominent bands appearing after exposing TU to 240 (blue trace) and 216 nm photons (red) isolated in solid Ar. The reference spectrum was the one taken right before the start of the 240 nm photolysis.

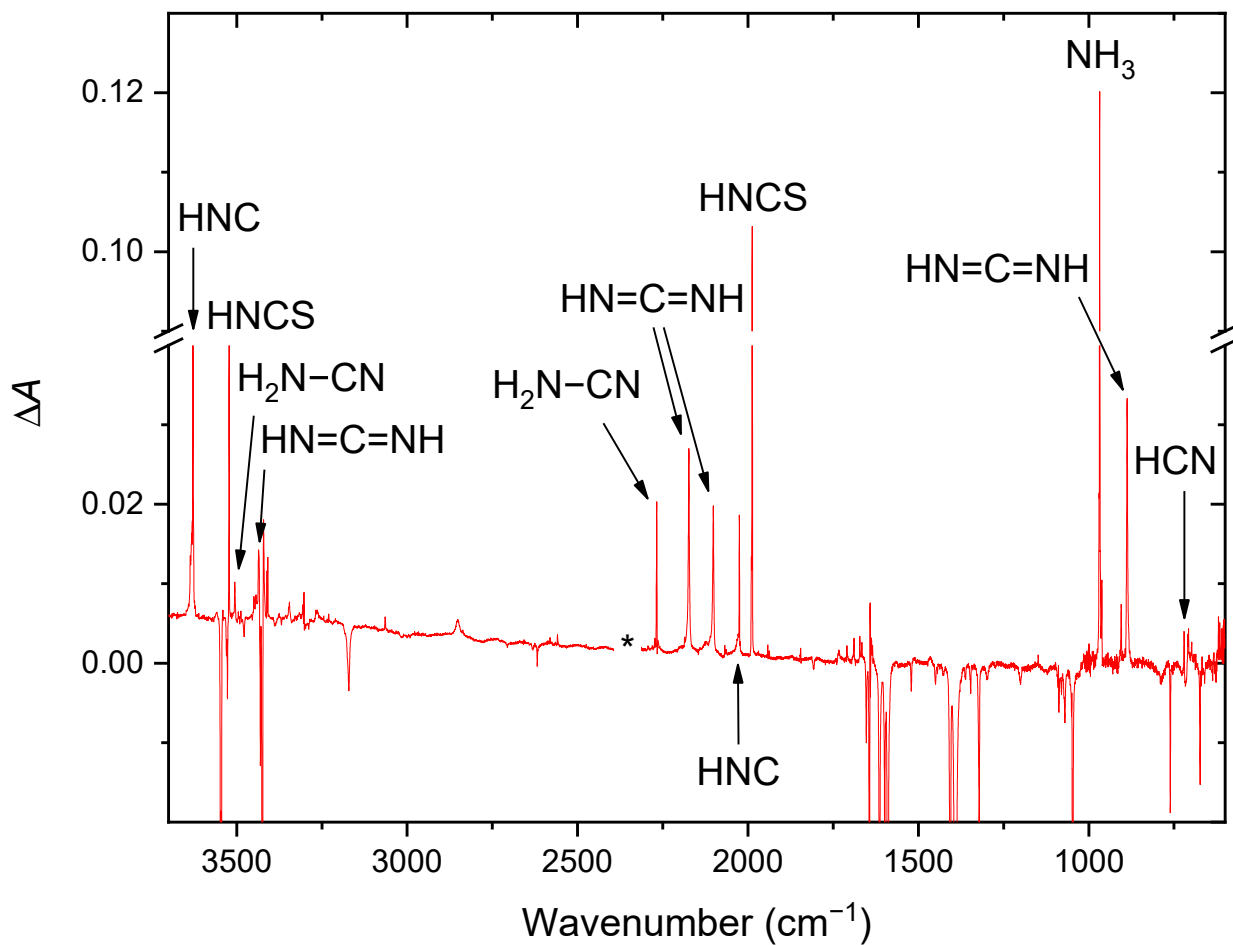

**FIG. S3:** Full-scale difference spectrum of the most prominent bands appearing after exposing TU to UV photons isolated in solid *para*- $\text{H}_2$ . The band of gaseous  $\text{CO}_2$  due to imperfect purge is marked with asterisks. The reference spectrum was the one taken right before the start of the 240 nm photolysis.

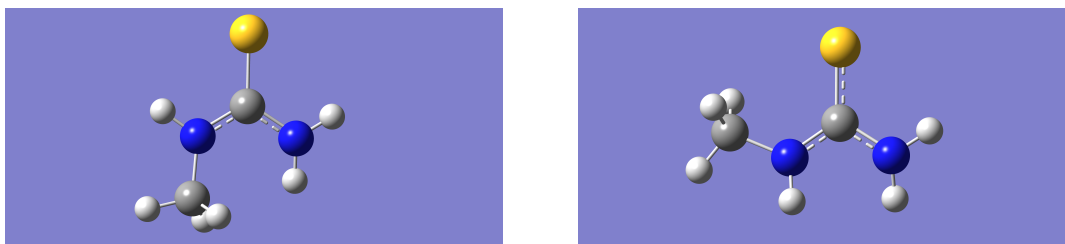

**FIG. S4:** Structures of the *a*- (left) and *s*-thione (right) tautomers of NMTU.

**TABLE S4:** The main experimental vibrational frequencies and intensities of *anti*-NMTU isolated in solid Ar and *para*-H<sub>2</sub> matrices as well as values obtained by theory.

| Vibrational mode                   | Ar                     | <i>para</i> -H <sub>2</sub> | Theor.          |       |
|------------------------------------|------------------------|-----------------------------|-----------------|-------|
|                                    | $\tilde{\nu}^a$        | $\tilde{\nu}^a$             | $\tilde{\nu}^b$ | $I^c$ |
| $\nu_{\text{as}}(\text{NH}_2)$     | 3539.2                 | 3548.3, <u>3546.2</u>       | 3564.1          | 46.2  |
| $\nu(\text{N-H})$                  | <u>3485.8</u> , 3481.3 | 3480.9                      | 3469.3          | 49.2  |
| $\nu_{\text{s}}(\text{NH}_2)$      | 3423.3                 | 3432.8, <u>3430.3</u>       | 3442.9          | 27.2  |
| $\nu_{\text{as}}(\text{CH}_3)'$    |                        | 3009.5                      | 2980.0          | 10.0  |
| $\nu_{\text{as}}(\text{CH}_3)''$   |                        | 2919.3b, 2908.0b            | 2884.4          | 30.3  |
| $\nu_{\text{s}}(\text{CH}_3)$      |                        | 3009.5                      | 2838.6          | 52.2  |
| $\beta(\text{NH}_2)$               | 1595.7                 | 1598.6                      | 1587.8          | 150.7 |
| $\beta(\text{N-H})$                | 1520.1, 1509.4         | 1518.5sh, 1510.6            | 1490.9          | 340.7 |
| $\beta_{\text{as}}(\text{CH}_3)'$  | 1475.7                 | 1475.8                      | 1473.7          | 14.9  |
| $\beta_{\text{as}}(\text{CH}_3)''$ | 1453.7                 | 1454.3                      | 1456.6          | 20.2  |
| $\beta_{\text{as}}(\text{CH}_3)''$ |                        |                             | 1452.4          | 12.0  |
| $\beta_{\text{s}}(\text{CH}_3)$    | 1390.0                 | 1389.7                      | 1382.0          | 69.5  |
| $\rho(\text{N-H})$                 | 1271.2b, 1265.5b       | 1267.6                      | 1268.0          | 114.4 |
| $\rho(\text{CH}_3)$                | <u>1152.5</u> , 1148.3 | <u>1152.2</u>               | 1139.0          | 19.7  |
| $\nu(\text{C-N})$                  | 1121.6                 | 1123.5                      | 1109.1          | 58.2  |
| $\rho(\text{NH}_2)$                | 978.8                  | 979.7                       | 947.5           | 29.8  |
| $\nu(\text{C=S})$                  | 797.2                  | 798.0b, 785.0b              | 781.0           | 10.6  |

<sup>a</sup> in cm<sup>-1</sup>; b: broad; more intense components of split bands are underlined

<sup>b</sup> anharmonic vibrational frequencies in cm<sup>-1</sup> as obtained at the B3LYP/cc-pV(T+d)Z level of theory

<sup>c</sup> harmonic vibrational intensities in km mol<sup>-1</sup> as obtained at the B3LYP/cc-pV(T+d)Z level of theory

**TABLE S5:** The main experimental vibrational frequencies and intensities of *syn*-NMTU isolated in solid Ar and *para*-H<sub>2</sub> matrices as well as values obtained by theory.

| Vibrational mode                    | Ar                     | <i>para</i> -H <sub>2</sub> | Theor.          |       |
|-------------------------------------|------------------------|-----------------------------|-----------------|-------|
|                                     | $\tilde{\nu}^a$        |                             | $\tilde{\nu}^b$ | $I^c$ |
| $\nu_{\text{as}}(\text{NH}_2)$      | 3536.2                 | 3538.4                      | 3514.2          | 37.2  |
| $\nu(\text{N-H})$                   | <u>3466.1</u> , 3456.9 | 3459.4                      | 3439.6          | 18.5  |
| $\nu_{\text{s}}(\text{NH}_2)$       | 3413.3                 | 3419.4                      | 3394.2          | 20.6  |
| $\nu_{\text{as}}(\text{CH}_3)'$     | 3004.3                 | 3000.9                      | 2978.9          | 12.9  |
| $\nu_{\text{as}}(\text{CH}_3)''$    | 2976.9                 | 2970.3                      | 2954.2          | 22.4  |
| $\nu_{\text{s}}(\text{CH}_3)$       | 2956.1                 | 2955.0                      | 2920.5          | 38.1  |
| –                                   | 2891.9                 | 2891.1, 2860.0              | –               | –     |
| $\beta(\text{NH}_2)$                | 1591.6                 | 1595.2                      | 1591.3          | 115.3 |
| $\beta(\text{N-H})$                 | 1528.9                 | 1528.2                      | 1517.5          | 176.6 |
| $\nu_{\text{as}}(\text{CH}_3)'$     | 1471.4                 | 1471.4                      | 1471.9          | 8.0   |
| $\nu_{\text{as}}(\text{CH}_3)''$    | <u>1458.2</u> , 1456.9 | 1458.9                      | 1453.3          | 43.6  |
| $\nu_{\text{as}}(\text{CH}_3)''$    | <u>1445.8</u> , 1435.2 | <u>1447.0</u> , 1436.6      | 1430.6          | 25.8  |
| $\nu_{\text{s}}(\text{CH}_3)$       | 1374.7                 | 1376.4                      | 1364.8          | 156.8 |
| $\rho(\text{N-H})$                  | 1302.8, 1291.3         | 1295.8b                     | 1284.2          | 130.7 |
| $\nu(\text{N-CH}_3)$                | 1168.8                 | 1167.2                      | 1151.6          | 18.9  |
| $\rho(\text{CH}_3)''$               | –                      | –                           | 1131.1          | 11.5  |
| $\rho(\text{CH}_3)'$                | 1123.3                 | –                           | 1119.5          | 8.5   |
| –                                   | 1104.0                 | –                           | –               | –     |
| –                                   | 996.5                  | 989.4b                      | –               | –     |
| $\rho(\text{NH}_2)$                 | <u>965.7</u> , 962.3   | 953.6                       | 968.2           | 42.3  |
| –                                   | 813.2                  | –                           | –               | –     |
| $\nu(\text{C=S})$                   | 725.2                  | 725.9                       | 716.7           | 6.3   |
| –                                   | 692.7                  | –                           | –               | –     |
| $\beta_{\text{o.o.p.}}(\text{NCN})$ | 621.4                  | –                           | 608.9           | 17.3  |

<sup>a</sup> in cm<sup>-1</sup>; b: broad; more intense components of split bands are underlined

<sup>b</sup> anharmonic vibrational frequencies in cm<sup>-1</sup> as obtained at the B3LYP/cc-pV(T+d)Z



level of theory

<sup>c</sup> harmonic vibrational intensities in km mol<sup>-1</sup> as obtained at the B3LYP/cc-pV(T+d)Z level of theory

**TABLE S6:** The main experimental vibrational frequencies of the *a,s,t* and *s,s,t*-thiol conformers of NMTU isolated in solid Ar and *para*-H<sub>2</sub> matrices as well as values obtained by theory.

| Conformer    | Vibrational mode       | Ar              | <i>para</i> -H <sub>2</sub> | Theor.          |       |
|--------------|------------------------|-----------------|-----------------------------|-----------------|-------|
|              |                        | $\tilde{\nu}^a$ | $\tilde{\nu}^a$             | $\tilde{\nu}^b$ | $I^c$ |
| <i>a,s,t</i> | } $\nu(\text{C=NH})$ { | 1633.5b         | 1636b                       | 1642.8          | 209   |
| <i>s,s,t</i> |                        | 1622.1          | 1623.5                      | 1636.8          | 324   |

<sup>a</sup> in cm<sup>-1</sup>; b: broad

<sup>b</sup> anharmonic vibrational frequencies in cm<sup>-1</sup> as obtained at the B3LYP/cc-pV(T+d)Z level of theory

<sup>c</sup> harmonic vibrational intensities in km mol<sup>-1</sup> as obtained at the B3LYP/cc-pV(T+d)Z level of theory

**TABLE S7:** The main experimental vibrational frequencies of the *s,t*-thiol conformer of NMTU isolated in solid Ar and *para*-H<sub>2</sub> matrices as well as values obtained by theory.

| Vibrational mode                | Ar              | <i>para</i> -H <sub>2</sub> | Theor.          |       |
|---------------------------------|-----------------|-----------------------------|-----------------|-------|
|                                 | $\tilde{\nu}^a$ | $\tilde{\nu}^a$             | $\tilde{\nu}^b$ | $I^c$ |
| $\nu(\text{C=N}(-\text{CH}_3))$ | 1657b           | 1656.7                      | 1663.9          | 357   |

<sup>a</sup> in cm<sup>-1</sup>; b: broad

<sup>b</sup> anharmonic vibrational frequencies in cm<sup>-1</sup> as obtained at the B3LYP/cc-pV(T+d)Z level of theory

<sup>c</sup> harmonic vibrational intensities in km mol<sup>-1</sup> as obtained at the B3LYP/cc-pV(T+d)Z level of theory

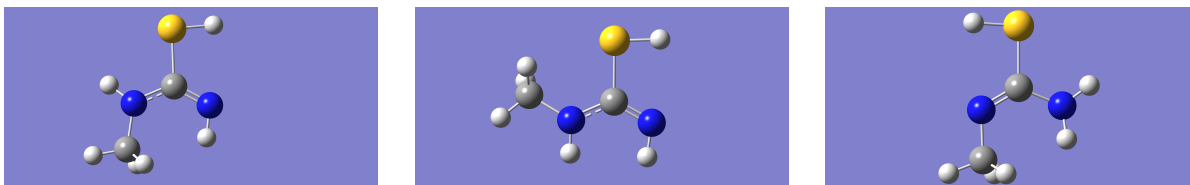

**FIG. S5:** Structures of the *a,s,t*- (left), *s,s,t*- (middle), and *s,t*-thiol (right) tautomers of NMTU.

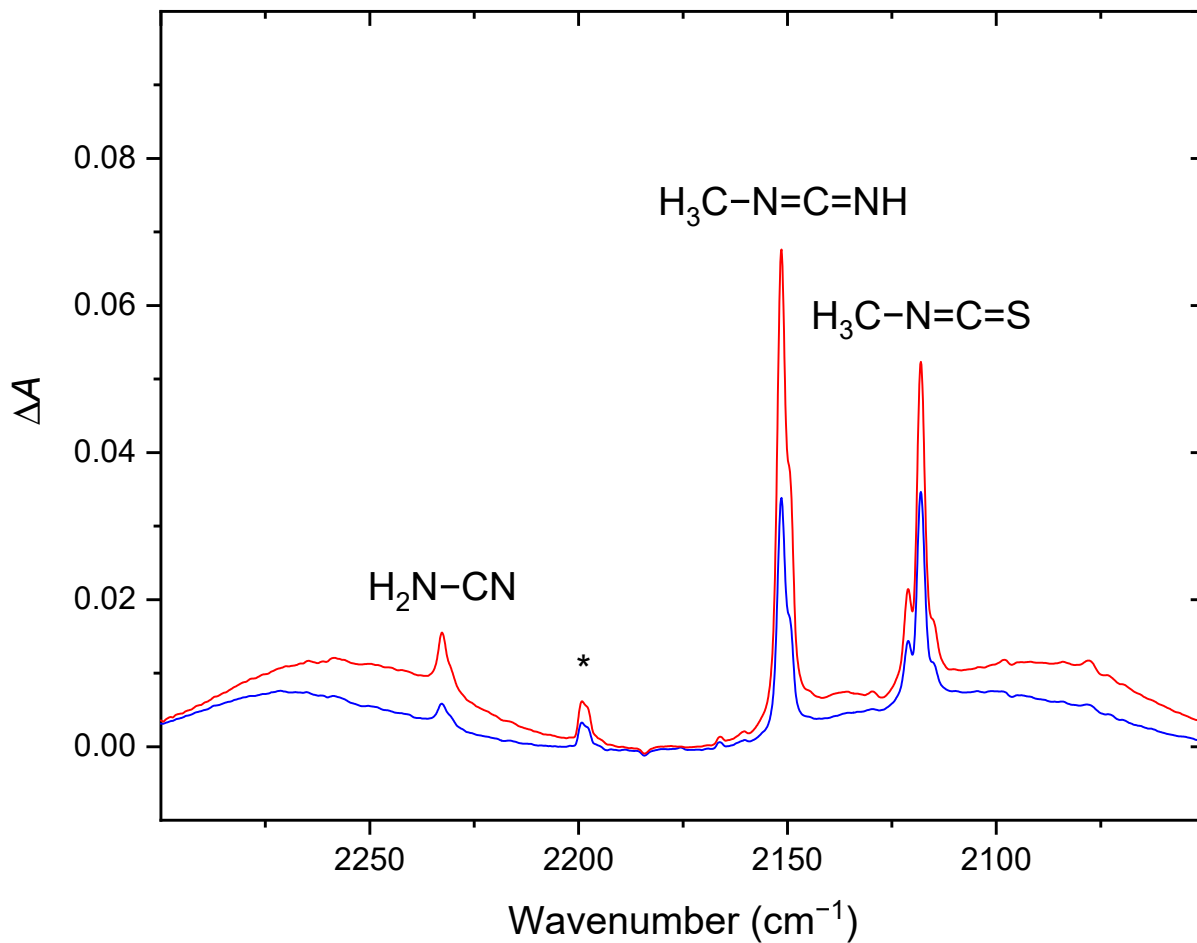

**FIG. S6:** Difference spectra of the most prominent bands appearing after exposing NMTU to 240 (blue trace) and 216 nm photons (red) isolated in solid Ar. The reference spectrum was the one taken right before the start of the 240 nm photolysis. The band marked with an asterisk can be assigned to the  $\beta(\text{H}_3\text{C}-\text{N}=\text{C}) + \nu(\text{N}=\text{C})$  combinational vibration of  $\text{H}_3\text{C}-\text{N}=\text{C}=\text{S}$  based on the computational results.

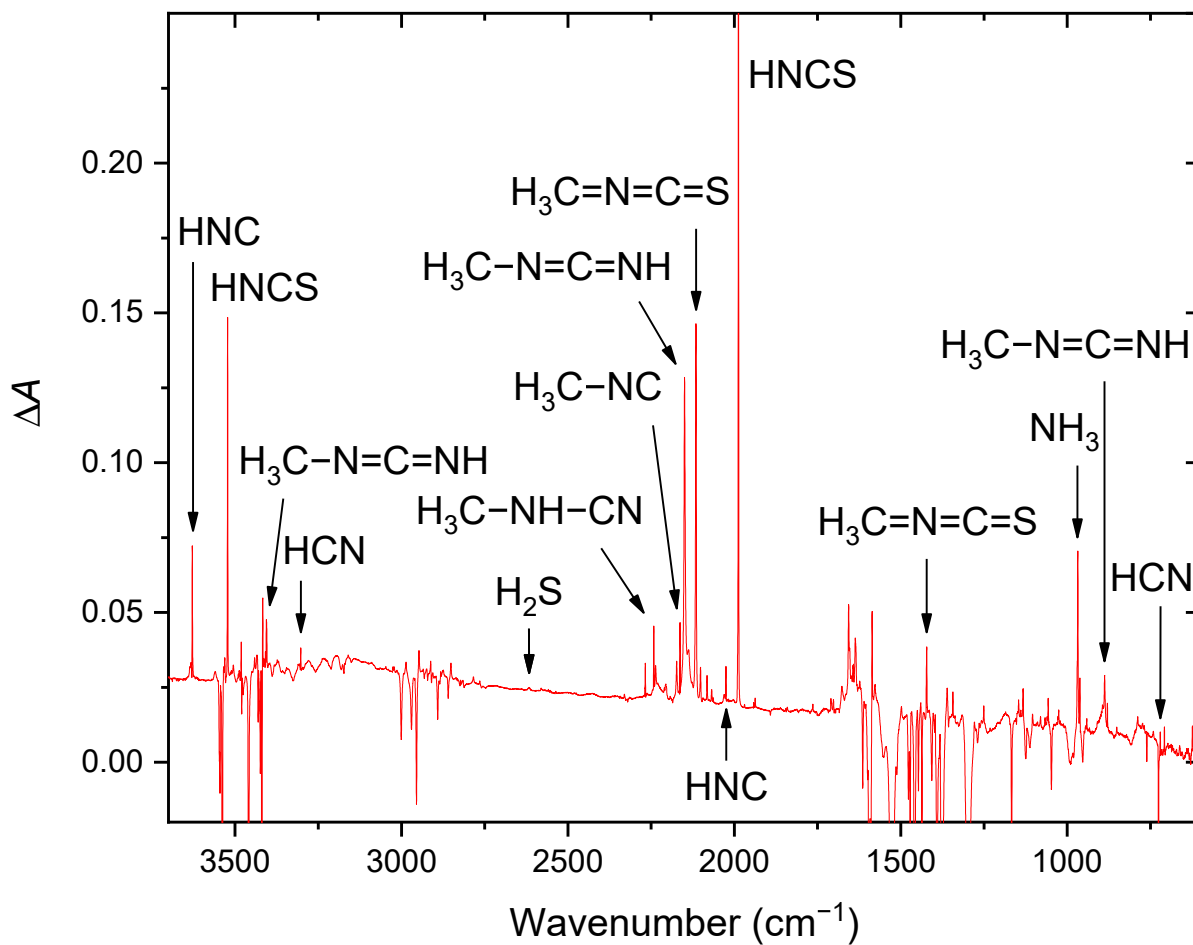

**FIG. S7:** Full-scale difference spectrum of the most prominent bands appearing after exposing NMTU to UV photons isolated in solid *para*-H<sub>2</sub>. The reference spectrum was the one taken right before the start of the 240 nm photolysis. Note that some bands of TU and its irradiation products can be observed due to TU impurity in the sample in this experiment.

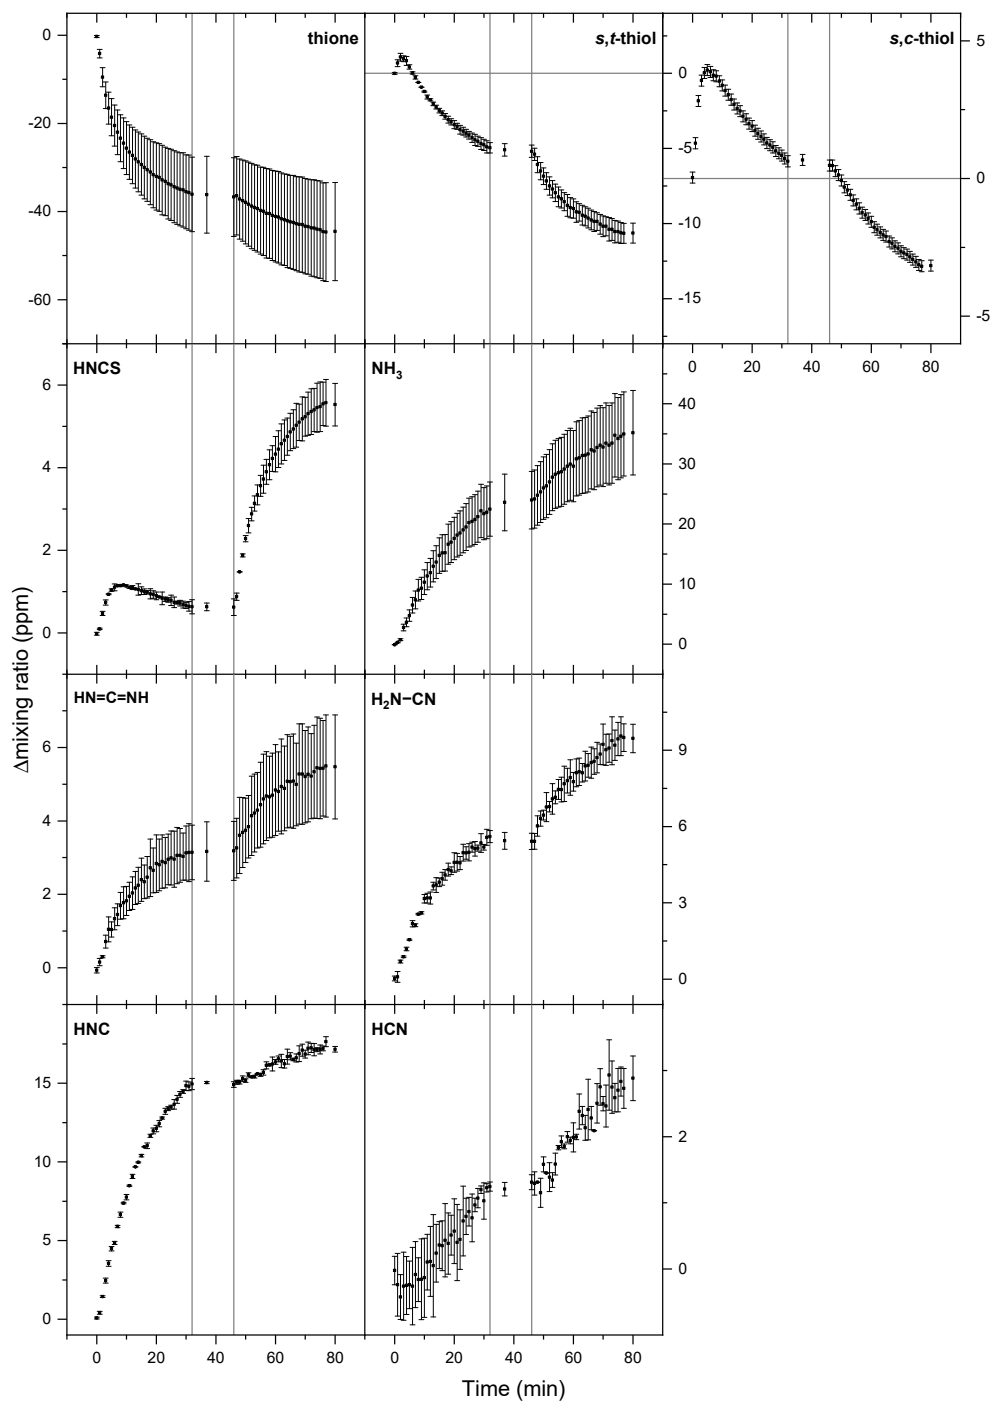

**FIG. S8:** Kinetic curves of TU and the products belonging to the laser UV photolysis. The horizontal lines on the panels showing the thiol tautomers mark the zero reference point, whereas the vertical lines at 32 and 46 minutes on each panel mark the time period when the irradiation was paused when switching from 240 nm to 216 nm.

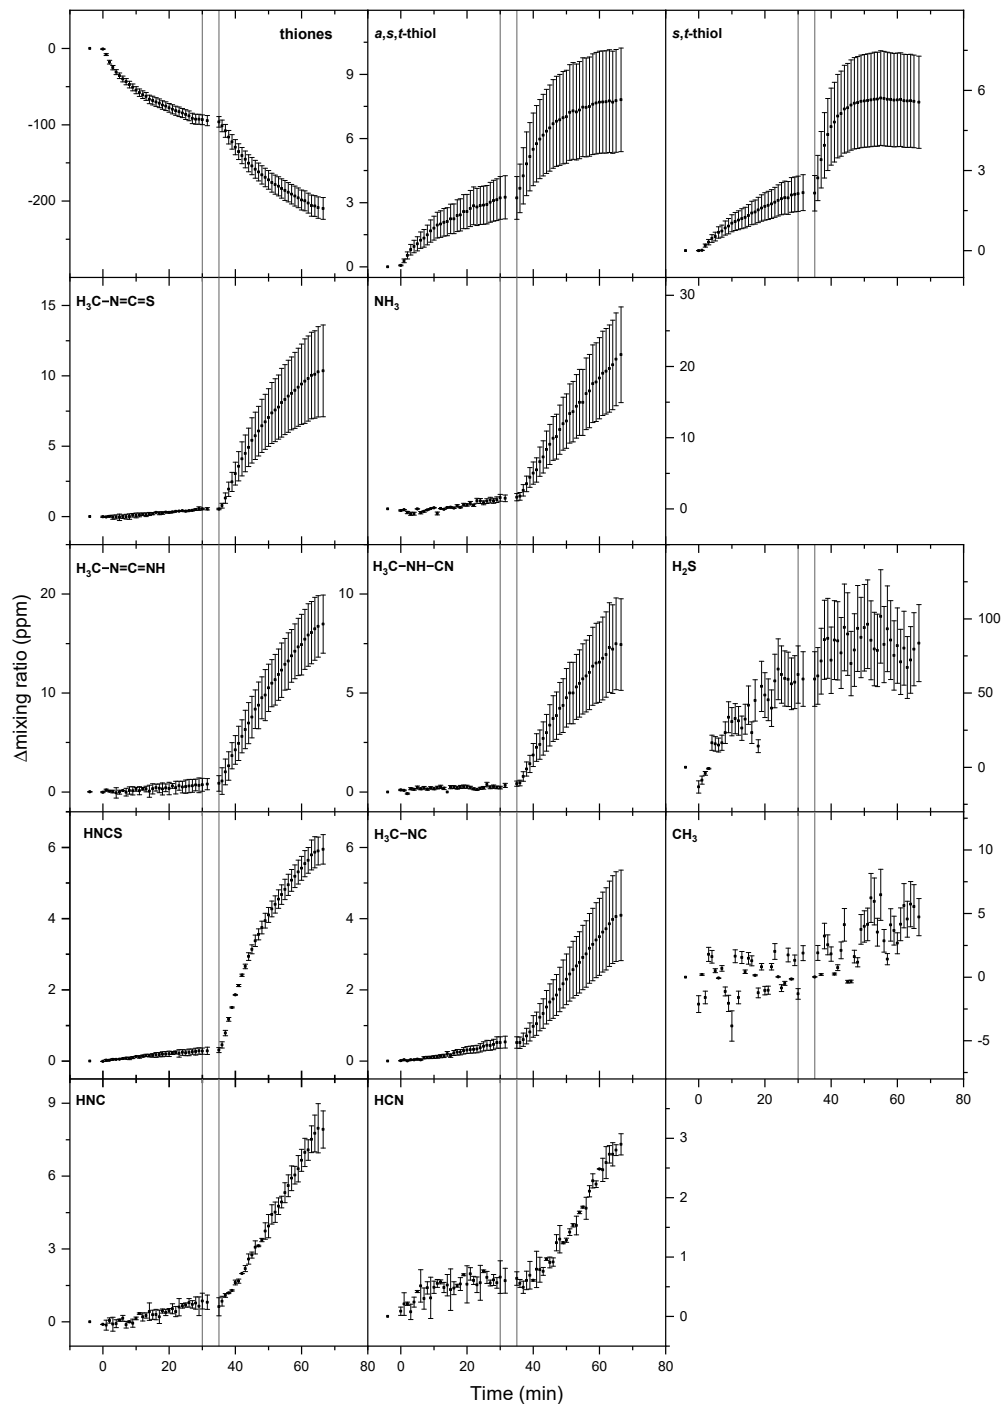

**FIG. S9:** Kinetic curves of NMTU and the products belonging to the laser UV laser photolysis. The vertical lines at 30 and 35 minutes into the irradiation on each panel mark the time period when the irradiation was paused when switching from 240 nm to 216 nm.

## REFERENCES

- <sup>1</sup>H. Rostkowska, L. Lapinski, A. Khvorostov, and M. J. Nowak, “Proton-transfer processes in thiourea: UV induced thione  $\rightarrow$  thiol reaction and ground state thiol  $\rightarrow$  thione tunneling,” *The Journal of Physical Chemistry A* **107**, 6373–6380 (2003).
- <sup>2</sup>H. Rostkowska, L. Lapinski, and M. J. Nowak, “Hydrogen-atom tunneling through a very high barrier; Spontaneous thiol  $\rightarrow$  thione conversion in thiourea isolated in low-temperature Ar, Ne, H<sub>2</sub> and D<sub>2</sub> matrices,” *Physical Chemistry Chemical Physics* **20**, 13994–14002 (2018).
